# Supplementary material for: Effect of Light Quality and Media Components on Shoot Growth, Rutin, and Quercetin Production from Common Buckwheat
Source: PubMed Central journal article supplement — ACS Omega. 2022 Jul 22;7(30):26566–72. doi: 10.1021/acsomega.2c02728 (PMC9352154; doi:10.1021/acsomega.2c02728), 2022-07-22
Supplement: ao2c02728_si_001.pdf [file ao2c02728_si_001.pdf]

Supplementary data

## **Effect of Light Quality and Media Components on Shoot Growth, Rutin and Quercetin production from common buckwheat**

Ahmed M. M. Gabr<sup>1</sup>, Nesrin M Fayek<sup>2</sup>, Hossam M. Mahmoud<sup>3</sup>, Mohamed K. El-Bahr<sup>1</sup>, Hanan S. Ebrahim<sup>1</sup>, Oksana Sytar<sup>4,5</sup>, Ali M. El-Halawany<sup>2\*</sup>

<sup>1</sup>*Department of Plant Biotechnology, Biotechnology Research Institute, National Research Centre (NRC), Cairo12622, Egypt*

<sup>2</sup>*Pharmacognosy Department, College of Pharmacy, Cairo University, Kasr El Aini st., 11562, Cairo, Egypt*

<sup>3</sup>*Nawah Scientific Co., El Mokattam, Egypt.*

<sup>4</sup>*Plant Biology Department, Educational and Scientific Center “Institute of Biology and Medicine”, Taras Shevchenko National University of Kyiv, Kyiv, Ukraine.*

<sup>5</sup>*Department of Plant Physiology, Slovak Agricultural University in Nitra, Tr. A. Hlinku 2, 94976 Nitra, Slovak Republic*

### **\*Corresponding author:**

**Ali Mahmoud El-Halawany, PhD**

Department of Pharmacognosy, Faculty of Pharmacy, Cairo University, Cairo, Egypt.

Email: ali.elhalawany@pharma.cu.edu.eg

Tel/Fax: +201005554846

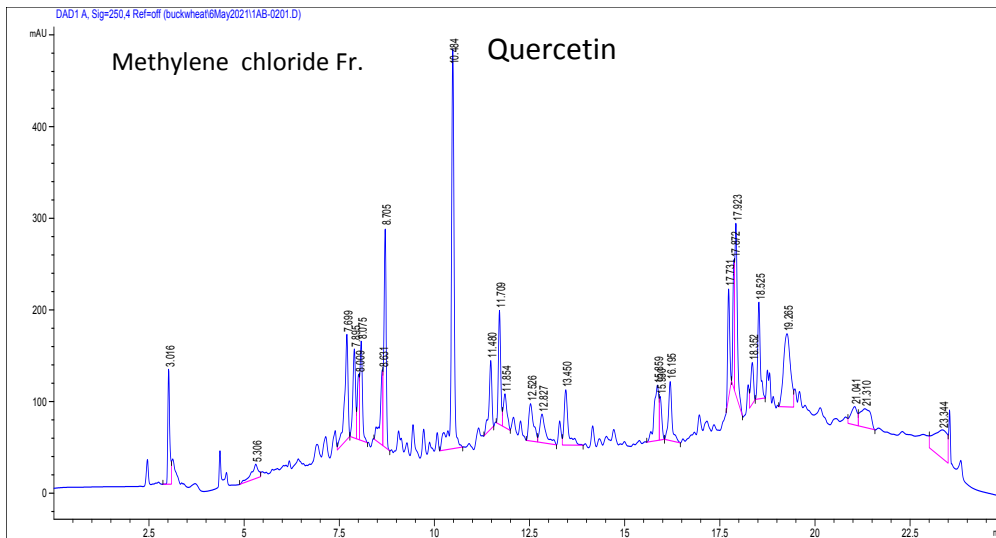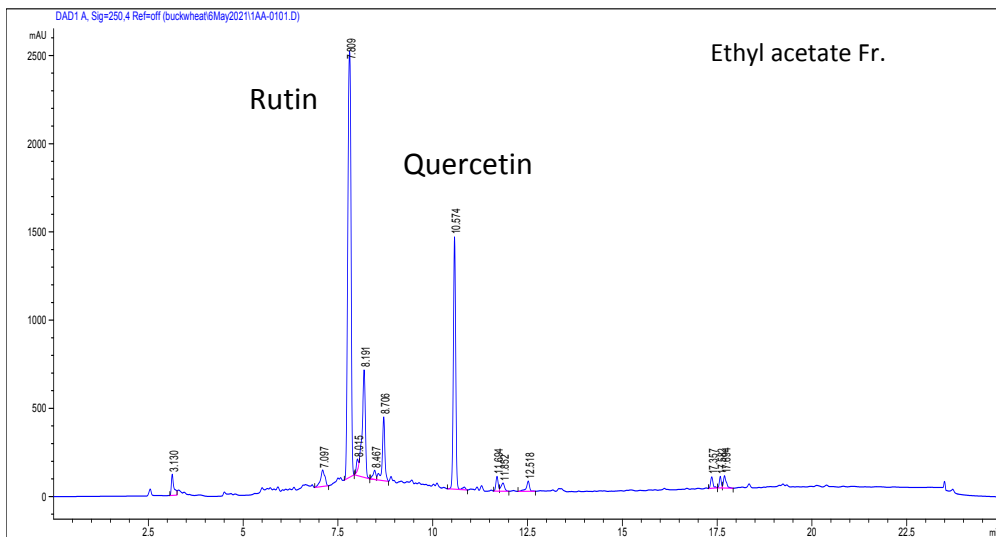

Figure S1: Examples of HPLC chromatograms for rutin and quercetin of in methylene chloride and ethyl acetate fractions

Ali ElHalawany\_H\_Q

Microanalytical Unit - FOPCU - NMR laboratory  
www.pharma.cu.edu.eg dir-mau.fopcu@pharma.cu.edu.eg

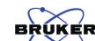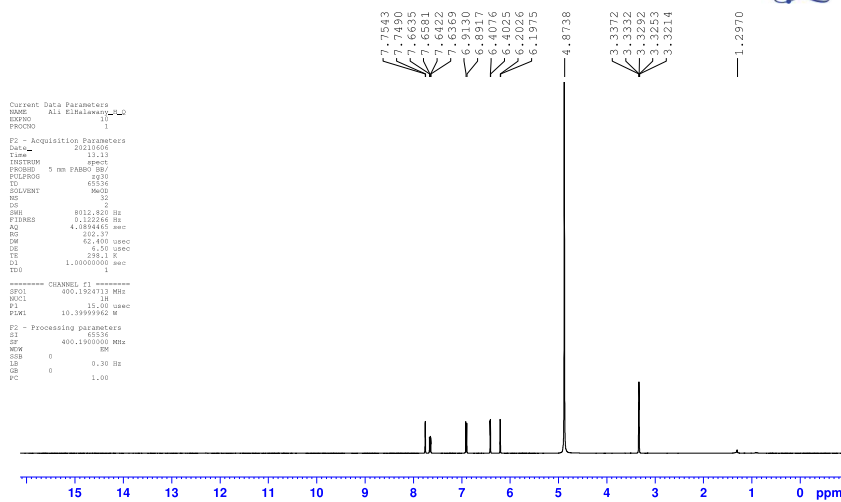

Ali ElHalawany\_H\_Q

Microanalytical Unit - FOPCU - NMR laboratory  
www.pharma.cu.edu.eg dir-mau.fopcu@pharma.cu.edu.eg

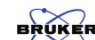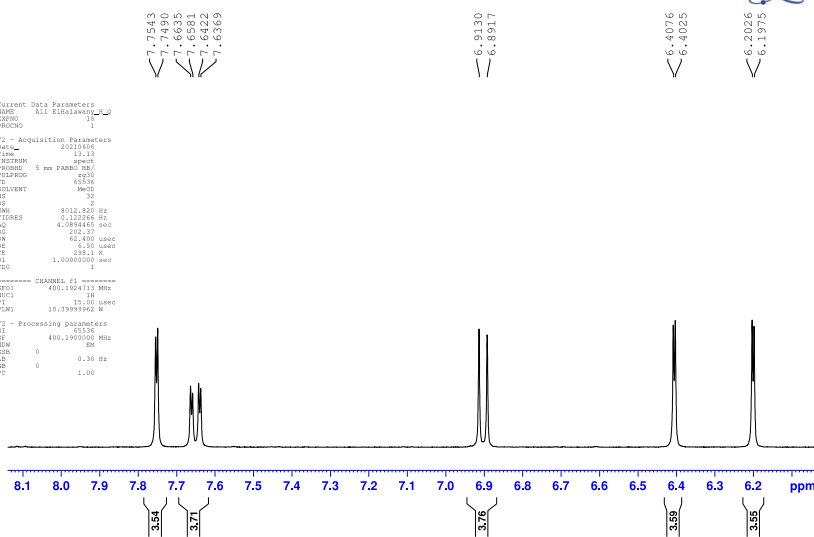

**Figure S2. <sup>1</sup>H-NMR spectra of quercetin isolated from the shootlets**



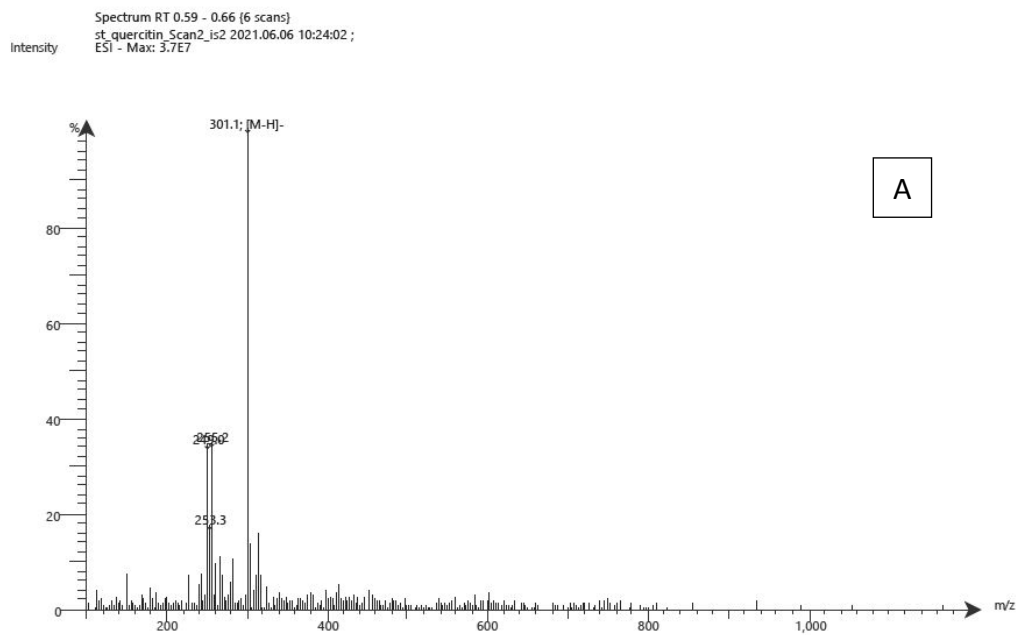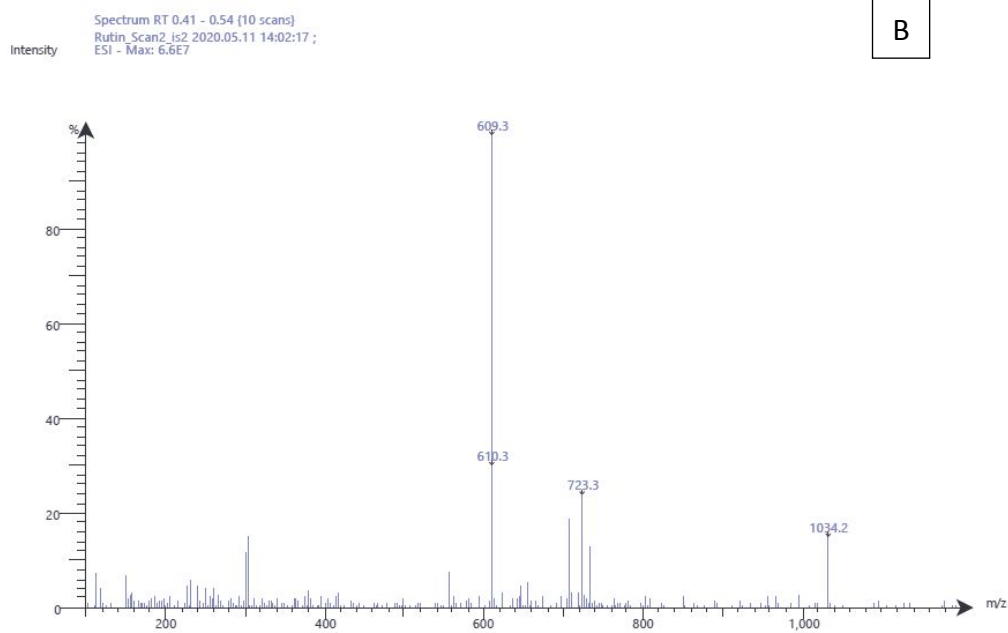

Figure S4. ESI Mass spectra of quercetin (A) and Rutin (B).
